# Supplementary material
Source: HighWire-hosted journal article supplement (https://openheart.bmj.com/content/12/1/e003355)

## The clinical course and outcomes of supraaortic stenosis in adults

### SUPPLEMENTARY MATERIALS

**Supplement 1.** Collected variables, their definitions and percentage missing for baseline variables.

**Supplement 2.** Supplementary methods, details regarding linear mixed-effects model analysis

**Supplement 3.** Additional details for medication use stratified by previous operated state, sex and Williams-Beuren.

**Supplement 4.** Causes of death and patient characteristics of the deceased patients

**Supplement 5.** Kaplan- Meier estimates for survival, stratified by A) previous operated state, B) sex and C) Williams-Beuren.

**Supplement 6.** Kaplan- Meier estimates for event-free survival excluding arrhythmic events, A) all patients and B) previous operated state.

**Supplement 7.** Summary of all events that occurred during follow-up of adult patients with SVAS.

**Supplement 8.** Adverse event rates (AER)/ 1,000 patient years of collected cardiovascular events, stratified by previous operated state, including p-value.

**Supplement 9.** Coefficients of linear mixed model for peak velocity (m/s) progression.

**Supplement 10.** Plot of subject specific predictions of the linear mixed model for peak velocity (m/s).

The clinical course and outcomes of supra- valvular aortic stenosis in adults

Supplement 1.

| Collected data                             | %Missing | Definition                                                                                                                                                                                                                                          |
|--------------------------------------------|----------|-----------------------------------------------------------------------------------------------------------------------------------------------------------------------------------------------------------------------------------------------------|
| Year of birth                              | 0%       | Year of birth                                                                                                                                                                                                                                       |
| Age at time of surgery                     | 0%       | Age at time of primary SVAS surgery before inclusion, in years                                                                                                                                                                                      |
| Sex                                        | 0%       | Male or female                                                                                                                                                                                                                                      |
| Height                                     | 8%       | Height as described at first visit, in meters                                                                                                                                                                                                       |
| Weight                                     | 26%      | Weight at first visit, in kilograms                                                                                                                                                                                                                 |
| Body mass index                            | 26%      | Body mass index, in kg/m2                                                                                                                                                                                                                           |
| Body surface area                          | 26%      | Body surface area using Du Bois formula, in m2                                                                                                                                                                                                      |
| Bicuspid valve                             | 9%       | Bicuspid aortic valve described or confirmed by echocardiography                                                                                                                                                                                    |
| Secondary stenosis present                 | 0%       | Valvular and/or subvalvular stenosis present besides the primary supra- valvular stenosis at first visit                                                                                                                                            |
| Concomitant congenital heart abnormalities | 0%       | Atrial septal defect, ventricular septal defect, patent ductus arteriosus, valvular pulmonary stenosis, peripheral pulmonary stenosis, tetralogy of Fallot or other congenital heart defects present at first visit or described in patient history |
| Prior coarctatio aortae                    | 0%       | Coarctatio aortae present at first visit or described in patient history                                                                                                                                                                            |
| Treated coarctatio aortae                  | 0%       |                                                                                                                                                                                                                                                     |
| Prior aneurysm aortae                      | 0%       | If the aorta was measured ≥40 millimetre at level of the aortic root, STJ, and/or ascending aorta at first visit or described in patient history                                                                                                    |
| Treated aneurysm                           | 0%       |                                                                                                                                                                                                                                                     |
| Genetically disorders                      | 0%       | Williams-Beuren, Noonan syndrome, Down syndrome, Marfan syndrome or other genetically disorders at first visit or described in patient history                                                                                                      |
| Mental retardation                         | 3%       | A form of mental retardation is described in the patient history                                                                                                                                                                                    |
| Family history of congenital heart defects | 62%      | 1st and 2nd degree relatives with a congenital heart disease at first visit. No cardiomyopathies.                                                                                                                                                   |
| Family history of cardiovascular disease   | 48%      | 1st degree relative with cardiovascular disease before the age of 55 for men and before the age of 65 for women relatives at first visit                                                                                                            |
| Smoking                                    | 36%      | Never, past = from >1 package year in patient history, currently smoking at first visit                                                                                                                                                             |
| History of hypertension                    | 0%       | Medical treatment and/or diagnosis of hypertension in patient history at first visit                                                                                                                                                                |
| History of diabetes mellitus               | 0%       | Medical treatment and/or diagnosis of diabetes mellitus in patient history at first visit                                                                                                                                                           |

### The clinical course and outcomes of supra-ventricular aortic stenosis in adults

|                                                     |     |                                                                                                                                                                                                                                                 |
|-----------------------------------------------------|-----|-------------------------------------------------------------------------------------------------------------------------------------------------------------------------------------------------------------------------------------------------|
| <b>History of hyperlipidaemia</b>                   | 6%  | Medical treatment and/or diagnosis of hyperlipidaemia in patient history at first visit                                                                                                                                                         |
| <b>Previous cardiac surgery</b>                     | 0%  | Prior cardiac surgery at first visit                                                                                                                                                                                                            |
| <b>Previous subvalvular intervention</b>            | 0%  | Prior intervention indicated for the subvalvular stenosis at first visit                                                                                                                                                                        |
| <b>Previous valvular intervention</b>               | 0%  | Prior intervention indicated for a valvular stenosis at first visit                                                                                                                                                                             |
| <b>Previous supra-ventricular intervention</b>      | 0%  | Prior intervention indicated for a supra-ventricular stenosis at first visit                                                                                                                                                                    |
| <b>Prior cardiac myopathy</b>                       | 0%  | Hypertrophy or dilated at first visit                                                                                                                                                                                                           |
| <b>Symptoms at first visit</b>                      | 0%  | Any symptoms reported at first visit                                                                                                                                                                                                            |
| <b>NYHA classification</b>                          | 11% | New-York Heart Association classification at first visit. NYHA I: no symptoms; NYHA II: symptoms during extensive physical activity; NYHA III: symptoms during physical activity; NYHA IV: symptoms during few or no physical activity, at rest |
| <b>Medication use at first visit</b>                | 6%  | Medication use at first visit; none, beta-blocker, ACE inhibitor, diuretics, anti-arrhythmic medication, calcium channel blockers, vitamin K antagonists, platelet inhibitors, angiotensin receptor blockers, other medication                  |
| <b><u>Echocardiography definitions</u></b>          |     |                                                                                                                                                                                                                                                 |
| <b>Left ventricular systolic function</b>           | 8%  | Left ventricular function as described in the echocardiography report at first visit; in % and categorized in normal, mildly impaired, moderately impaired, or severely impaired                                                                |
| <b>Aortic stenosis</b>                              | 28% | Aortic stenosis as described. Grade: 1/3 or 1/4 = mild; 2/3, 2/4, 3/4 = moderate; 3/3 or 4/4 = severe                                                                                                                                           |
| <b>Aortic regurgitation</b>                         | 12% | Aortic regurgitation as described. Grade: 1/3 or 1/4 = mild; 2/3, 2/4, 3/4 = moderate; 3/3 or 4/4 = severe                                                                                                                                      |
| <b>Mitral stenosis</b>                              | 17% | Mitral stenosis as described. Grade: 1/3 or 1/4 = mild; 2/3, 2/4, 3/4 = moderate; 3/3 or 4/4 = severe                                                                                                                                           |
| <b>Mitral regurgitation</b>                         | 11% | Mitral regurgitation as described. Grade: 1/3 or 1/4 = mild; 2/3, 2/4, 3/4 = moderate; 3/3 or 4/4 = severe                                                                                                                                      |
| <b>Tricuspid regurgitation</b>                      | 12% | Tricuspid regurgitation as described. Grade: 1/3 or 1/4 = mild; 2/3, 2/4, 3/4 = moderate; 3/3 or 4/4 = severe                                                                                                                                   |
| <b>Left ventricular outflow tract diameter</b>      | 82% | Left ventricular outflow tract diameter at first visit echocardiography, in mm                                                                                                                                                                  |
| <b>Left ventricular outflow tract peak velocity</b> | 59% | Peak velocity at level of the left ventricular outflow tract at first visit echocardiography, in m/s                                                                                                                                            |
| <b>Aortic valve mean gradient</b>                   | 55% | Mean gradient of the aortic valve at first visit echocardiography, in mmHg                                                                                                                                                                      |
| <b>Aortic valve peak velocity</b>                   | 17% | Peak velocity at level of the aortic valve at first visit echocardiography, in m/s                                                                                                                                                              |
| <b>Aortic valve VTI</b>                             | 68% | Aortic valve VTI at first visit echocardiography, in cm                                                                                                                                                                                         |
| <b>Left ventricular outflow tract VTI</b>           | 82% | Left ventricular outflow tract VTI at first visit echocardiography, in cm                                                                                                                                                                       |

The clinical course and outcomes of supra-ventricular aortic stenosis in adults

|                                             |     |                                                                                                                                 |
|---------------------------------------------|-----|---------------------------------------------------------------------------------------------------------------------------------|
| Tricuspid regurgitation velocity            | 77% | Peak velocity of tricuspid valve at first visit echocardiography, in m/s                                                        |
| <u>ECG definitions</u>                      |     |                                                                                                                                 |
| Heart rate                                  | 3%  | Heart rate at first visit, in beats per minute (bpm)                                                                            |
| PR-interval                                 | 17% | PR interval at first visit, in Ms                                                                                               |
| QRS                                         | 14% | QRS duration at first visit, in Ms                                                                                              |
| QT-time                                     | 36% | QT-time at first visit, in Ms                                                                                                   |
| QTc-time                                    | 34% | QTc-time at first visit, in Ms                                                                                                  |
| Bundle branch block                         | 0%  | QRS > 120 Ms. RBTB, if QRS positive in V1, LBTB, if negative in V1 at first visit                                               |
| Signs of LVH                                | 48% | Description of cardiologist in ECG report, or clear signs of LVH on ECG at first visit                                          |
| ST-segment changes                          | 29% | Description of cardiologist in ECG report or clear signs on ECG at first visit                                                  |
| Blood pressure                              | 6%  | BP in mmHg as measured at first visit. When patient with coarctatio aortae or two measurements: BP from right arm               |
| <u>Clinical outcomes</u>                    |     |                                                                                                                                 |
| Deceased during follow-up                   |     | Deceased between time of start study and date of last mortality check                                                           |
| Cause of death                              |     | Cardiac or non-cardiac cause of death                                                                                           |
| Heart failure                               |     | Development or worsening of heart failure, start or increase in diuretics or hospitalization needed                             |
| Arrhythmic events                           |     | Symptomatic and ECG registered or treatment was needed                                                                          |
| Thrombo-embolic event                       |     | Cerebrovascular accident, lung embolism, myocardial infarction, systemic embolism                                               |
| Intervention for subvalvular stenosis       |     | If secondary subvalvular stenosis was present                                                                                   |
| Intervention for valvular stenosis          |     | If secondary valvular stenosis was present                                                                                      |
| Intervention for supra-ventricular stenosis |     | SVAS related intervention or reintervention                                                                                     |
| Endocarditis                                |     | Endocarditis during follow-up                                                                                                   |
| Thoracic aortic aneurysm                    |     | Measured at admittance or maximum 1y before surgery , >40 millimetres at level of the aortic root, STJ, and/or ascending aorta, |
| Thoracic aortic dissection                  |     | Acute type A or type B dissection during follow-up                                                                              |
| Hospitalization for other cardiac reason    |     | Measured at admittance, or maximum 1y before surgery                                                                            |
| Other cardiac surgery or intervention       |     | Cardiac surgery or intervention not indicated for a LVOT obstruction                                                            |

## **The clinical course and outcomes of supra-ventricular aortic stenosis in adults**

### Supplement 2.

Maximum peak velocity of the entire LVOT trajectory (peak velocity) over time was analysed using linear mixed models. Natural cubic splines were added for time to allow for non-linear (flexible), subject-specific trajectories over time. The final covariates included in the models were: time, previous supra-ventricular intervention, sex, Williams-Beuren syndrome and interactions time\*(previous supra-ventricular intervention+ sex+ Williams-Beuren syndrome). Interaction terms were used to investigate the relative effect in the different subgroups. The number of knots for the cubic splines in the random-effects and fixed-effects parts were determined using a backwards selection approach. Comparisons between models were made with likelihood ratio tests, if appropriate. After model selection, within the random-effects part, the non-linear effect of time using 2 cubic splines proved to be sufficient in the model for peak velocity.

The clinical course and outcomes of supra- valvular aortic stenosis in adults

Supplement 3.

| Medication use                    | Overall (N=65) | Unoperated cohort (N=35) | Operated cohort (N=30) | P-value | Male (N=45) | Female (N=20) | P-value | Non-Williams-Beuren (N=36) | Williams-Beuren (N=29) | P-value |
|-----------------------------------|----------------|--------------------------|------------------------|---------|-------------|---------------|---------|----------------------------|------------------------|---------|
| None (n)                          | 43 (66.2)      | 26 (74.3)                | 17 (56.7)              | 0.098   | 31 (68.9)   | 12 (60.0)     | 0.588   | 26 (72.2)                  | 17 (58.6)              | 0.638   |
| β-blocker (n)                     | 4 (6.2)        | 1 (2.9)                  | 3 (10.0)               | 0.535   | 1 (2.2)     | 3 (15.0)      | 0.161   | 0 (0.0)                    | 4 (13.8)               | 0.060   |
| ACE inhibitor (n)                 | 2 (3.1)        | 0 (0.0)                  | 2 (6.7)                | 0.429   | 1 (2.2)     | 1 (5.0)       | 1.000   | 1 (2.8)                    | 1 (3.4)                | 1.000   |
| Diuretics (n)                     | 3 (4.6)        | 1 (2.9)                  | 2 (6.7)                | 0.930   | 1 (2.2)     | 2 (10.0)      | 0.470   | 1 (2.8)                    | 2 (6.9)                | 0.791   |
| Anti-arrhythmics (n)              | 2 (3.1)        | 1 (2.9)                  | 1 (3.3)                | 1.000   | 2 (4.4)     | 0 (0.0)       | 0.849   | 2 (5.6)                    | 0 (0.0)                | 0.608   |
| Calcium channel blockers (n)      | 1 (1.5)        | 0 (0.0)                  | 1 (3.3)                | 0.960   | 1 (2.2)     | 0 (0.0)       | 1.000   | 0 (0.0)                    | 1 (3.4)                | 0.880   |
| Vitamin K antagonists (n)         | 1 (1.5)        | 0 (0.0)                  | 1 (3.3)                | 0.960   | 0 (0.0)     | 1 (5.0)       | 0.681   | 0 (0.0)                    | 1 (3.4)                | 0.880   |
| Platelet inhibitors (n)           | 1 (1.5)        | 1 (2.9)                  | 0 (0.0)                | 1.000   | 1 (2.2)     | 0 (0.0)       | 1.000   | 1 (2.8)                    | 0 (0.0)                | 1.000   |
| Angiotensin receptor blockers (n) | 2 (3.1)        | 0 (0.0)                  | 2 (6.7)                | 0.429   | 1 (2.2)     | 1 (5.0)       | 1.000   | 0 (0.0)                    | 2 (6.9)                | 0.346   |
| Other medication (n)              | 6 (9.2)        | 2 (5.7)                  | 4 (13.3)               | 0.577   | 2 (4.4)     | 4 (20.0)      | 0.130   | 5 (13.9)                   | 1 (3.4)                | 0.358   |

Legend: ACE, angiotensin-converting enzyme

**The clinical course and outcomes of supra-ventricular aortic stenosis in adults**

Supplement 4.

|                  | Cause of death                                                                    | Patient characteristics                                                                                                                                                                                           |
|------------------|-----------------------------------------------------------------------------------|-------------------------------------------------------------------------------------------------------------------------------------------------------------------------------------------------------------------|
| <b>Patient 1</b> | Respiratory insufficiency with hypercapnic coma                                   | <ul style="list-style-type: none"><li>- 40 years old</li><li>- Female</li><li>- No other congenital anomalies</li><li>- Mental retardation</li><li>- Williams syndrome</li><li>- Operated cohort</li></ul>        |
| <b>Patient 2</b> | Post-operative heart failure after Bentall procedure for a degenerating homograft | <ul style="list-style-type: none"><li>- 36 years old</li><li>- Male</li><li>- Bicuspid valve</li><li>- Homograft implantation (Mediastinitis) and re-valvulotomy aortic valve</li><li>- Operated cohort</li></ul> |
| <b>Patient 3</b> | Unknown                                                                           | <ul style="list-style-type: none"><li>- 33 years old</li><li>- Male</li><li>- Absent left carotid artery</li><li>- Williams syndrome</li><li>- Unoperated cohort</li></ul>                                        |
| <b>Patient 4</b> | Haemolytic streptococcus bacteria with sepsis                                     | <ul style="list-style-type: none"><li>- 26 years old</li><li>- Male</li><li>- ASD</li><li>- Peripheral pulmonary stenosis</li><li>- Prior cardiac surgery</li><li>- Unoperated cohort</li></ul>                   |

The clinical course and outcomes of supra-ventricular aortic stenosis in adults

Supplement 5.

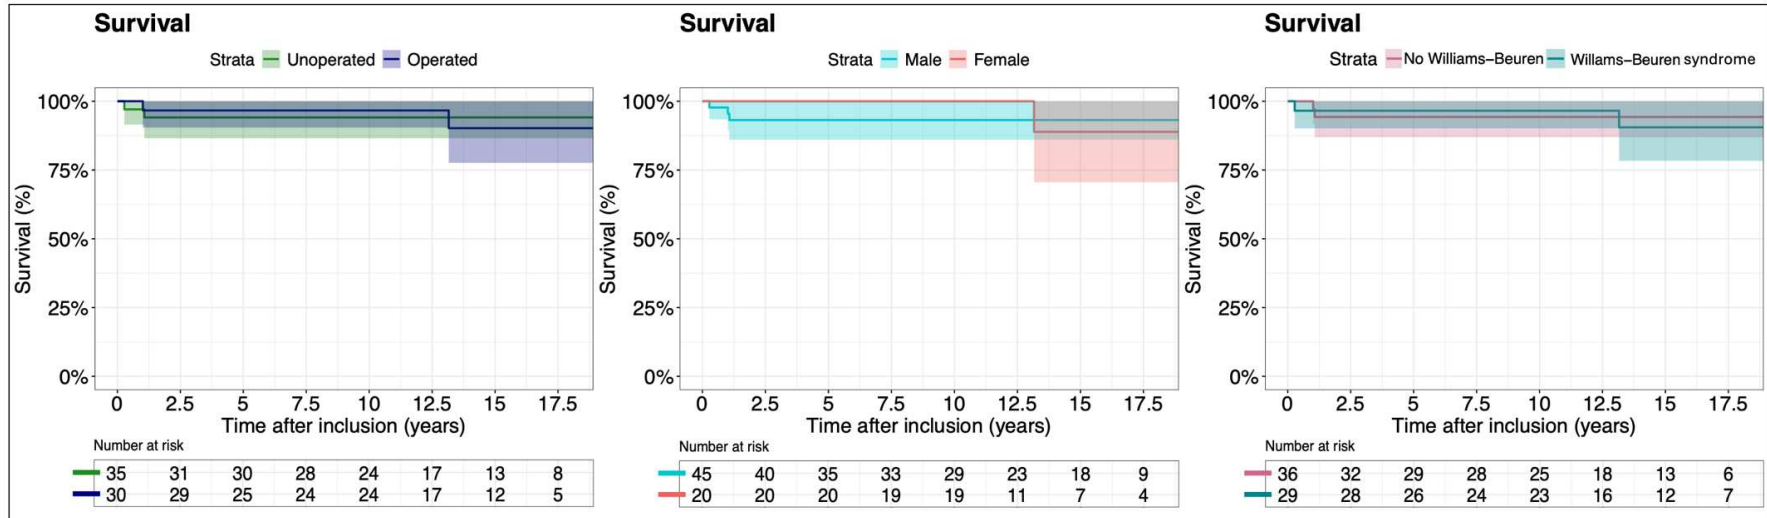



The clinical course and outcomes of supra-ventricular aortic stenosis in adults

Supplement 6.

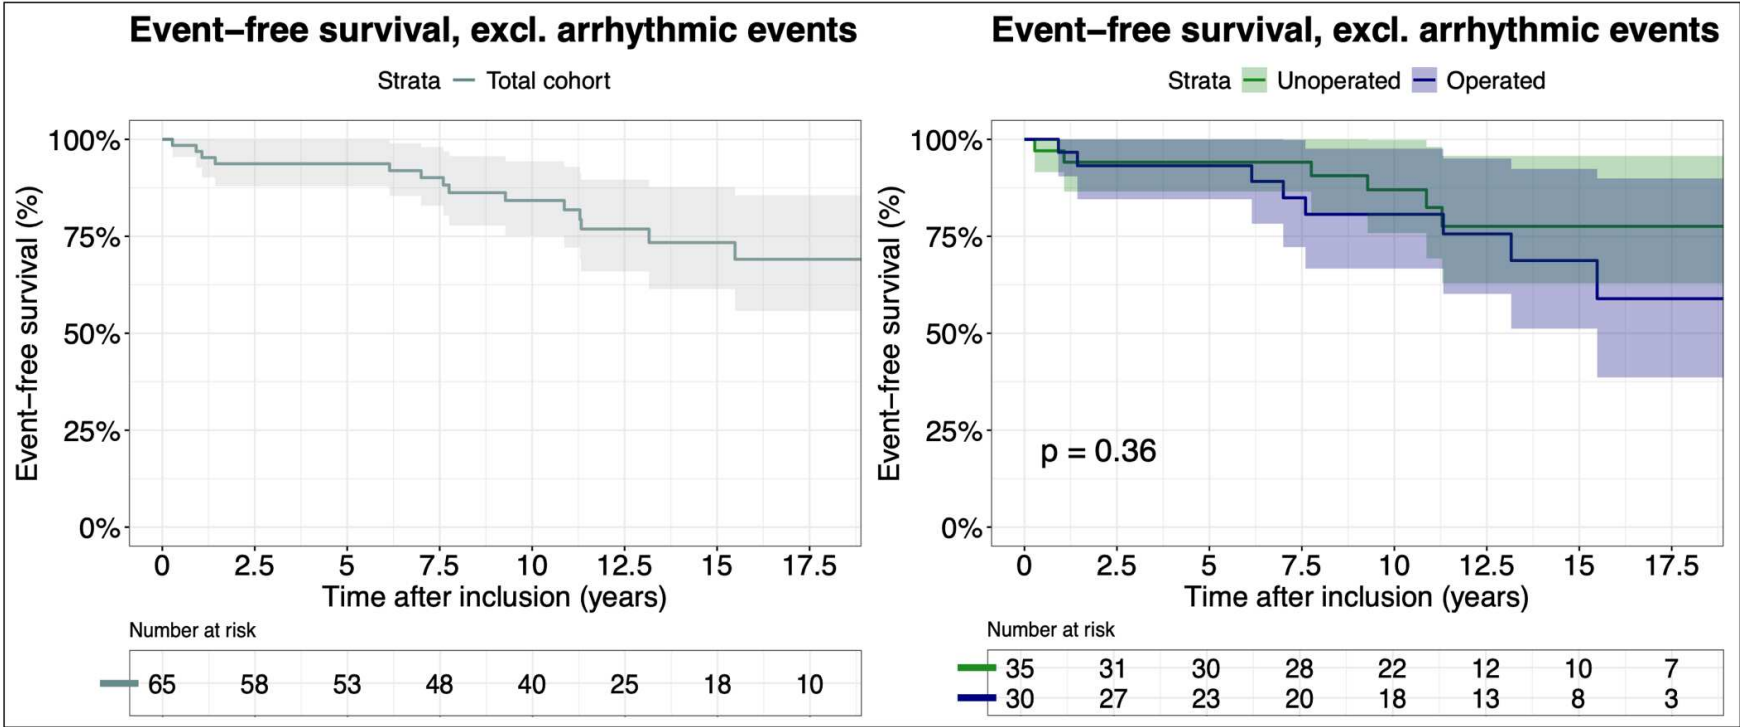

## The clinical course and outcomes of supra-avalvular aortic stenosis in adults

Supplement 7.

| Event                                                          | Type of event                    | Treatment or comment                                                            |
|----------------------------------------------------------------|----------------------------------|---------------------------------------------------------------------------------|
| <b>Heart failure</b> (5 events in 3 patients)                  | Heart failure                    | Medication                                                                      |
|                                                                | Heart failure                    | Medication                                                                      |
| <b>Arrhythmic events</b> (15 events in 8 patients)             | Atrial fibrillation              | Electrical cardioversion                                                        |
|                                                                | Atrial fibrillation              | Pulmonary vein isolation ablation                                               |
|                                                                | Atrial fibrillation              | Electrical cardioversion                                                        |
|                                                                | Atrial fibrillation              | Electrical cardioversion                                                        |
|                                                                | Atrial fibrillation              | Re- pulmonary vein isolation ablation                                           |
|                                                                | Atrial fibrillation              | Spontaneous cardioversion before planned electrical cardioversion               |
|                                                                | Atrial fibrillation              | Medication                                                                      |
|                                                                | Ventricular fibrillation         | Out of hospital cardiac arrest due to coronary event                            |
|                                                                | Atrial fibrillation              | Medication                                                                      |
|                                                                | VT/SVT                           | Medication                                                                      |
|                                                                | VT/SVT                           | Medication                                                                      |
|                                                                | Atrial tachycardia               | Medication                                                                      |
|                                                                | Atrial flutter                   | Medication                                                                      |
|                                                                | AV block                         | Pacemaker implantation                                                          |
|                                                                | AVRNT                            | AVRNT ablation                                                                  |
| <b>Thrombo- embolic events</b> (2 events in 2 patients)        | Pulmonary embolism               |                                                                                 |
|                                                                | DVT                              | After craniotomy                                                                |
| <b>Treated aneurysm</b> (1 event in 1 patient)                 | Ascending aortic dilatation 54mm | Aortic valve replacement + supra-coronary aortic replacement                    |
| <b>Acute aortic dissection</b>                                 | -                                | -                                                                               |
| <b>Endocarditis</b>                                            | -                                | -                                                                               |
| <b>Coronary event</b> (1 event in 1 patient)                   |                                  | Percutaneous coronary intervention, stent in left anterior descending artery    |
| <b>SVAS related (re-)intervention</b> (3 events in 2 patients) |                                  | Ross-procedure                                                                  |
|                                                                |                                  | Aortic valve replacement + aortic replacement                                   |
|                                                                |                                  | T. David procedure                                                              |
| <b>Cardiac surgery</b> (3 events in 3 patients)                |                                  | Mitral valve repair + two neo chordae + Tricuspid valve repair                  |
|                                                                |                                  | Aortic valve replacement with biological prosthesis due to aortic regurgitation |
|                                                                |                                  | Aortic valve replacement with mechanical prosthesis due to aortic regurgitation |
| <b>Cardiac intervention</b> (1 event in 1 patient)             |                                  | Stent in left pulmonary artery and right pulmonary artery                       |

The clinical course and outcomes of supra

Supplement 8.

|                                | Operated cohort                   |                     |                                        | Unoperated cohort                 |                     |                                        | [Operated/Unoperated] |
|--------------------------------|-----------------------------------|---------------------|----------------------------------------|-----------------------------------|---------------------|----------------------------------------|-----------------------|
|                                | Number of events during follow-up | Total patient years | Adverse event rate/1,000 patient years | Number of events during follow-up | Total patient years | Adverse event rate/1,000 patient years | P-value               |
| Heart failure                  | 5                                 | 380                 | 13.2 (4.3-30.7)                        | -                                 | 422                 | -                                      | -                     |
| Arrhythmic events              | 8                                 | 380                 | 21.1 (9.1-41.5)                        | 7                                 | 422                 | 16.6 (6.7-34.2)                        | 0.654                 |
| Thrombo- embolic events        | 1                                 | 380                 | 2.6 (0.1-14.7)                         | 1                                 | 422                 | 2.4 (0.1-13.2)                         | 0.948                 |
| Treated aneurysm               | 1                                 | 380                 | 2.6 (0.1-14.6)                         | -                                 | -                   | -                                      | -                     |
| Acute aortic dissection        | -                                 | -                   | -                                      | -                                 | -                   | -                                      | -                     |
| Endocarditis                   | -                                 | -                   | -                                      | -                                 | -                   | -                                      | -                     |
| Coronary event                 | 1                                 | 380                 | 2.7 (0.1-14.8)                         | -                                 | -                   | -                                      | -                     |
| SVAS related (re-)intervention | -                                 | -                   | -                                      | 3                                 | 422                 | 7.1 (1.5-20.8)                         | -                     |
| Cardiac surgery                | 2                                 | 380                 | 5.3 (0.7-19.0)                         | 1                                 | 422                 | 2.4 (0.1-13.2)                         | 0.567                 |
| Cardiac intervention           | 1                                 | 380                 | 2.6 (0.1-14.6)                         | -                                 | -                   | -                                      | -                     |

The clinical course and outcomes of supra-ventricular aortic stenosis in adults

Supplement 9.

|                                                                            | Linear mixed model for peak velocity (in m/s) |         |
|----------------------------------------------------------------------------|-----------------------------------------------|---------|
|                                                                            | Coefficient (m/s)                             | P-value |
| Intercept                                                                  | 3.0                                           | <0.001  |
| Time (time spline 1)                                                       | -0.4                                          | 0.080   |
| Time (time spline 2)                                                       | -0.2                                          | 0.428   |
| Prior supra-ventricular intervention before inclusion                      | -0.5                                          | 0.052   |
| Female                                                                     | -0.2                                          | 0.561   |
| Williams- Beuren syndrome                                                  | -0.9                                          | <0.001  |
| Time (time spline 1)*Prior supra-ventricular intervention before inclusion | -0.3                                          | 0.289   |
| Time (time spline 2)*Prior supra-ventricular intervention before inclusion | -0.5                                          | 0.117   |
| Time (time spline 1)*Female                                                | 0.8                                           | 0.017   |
| Time (time spline 2)*Female                                                | 0.8                                           | 0.018   |
| Time (time spline 1)*Williams- Beuren syndrome                             | 0.1                                           | 0.639   |
| Time (time spline 2)*Williams-Beuren syndrome                              | -0.2                                          | 0.570   |

## The clinical course and outcomes of supra-ventricular aortic stenosis in adults

Supplement 10.

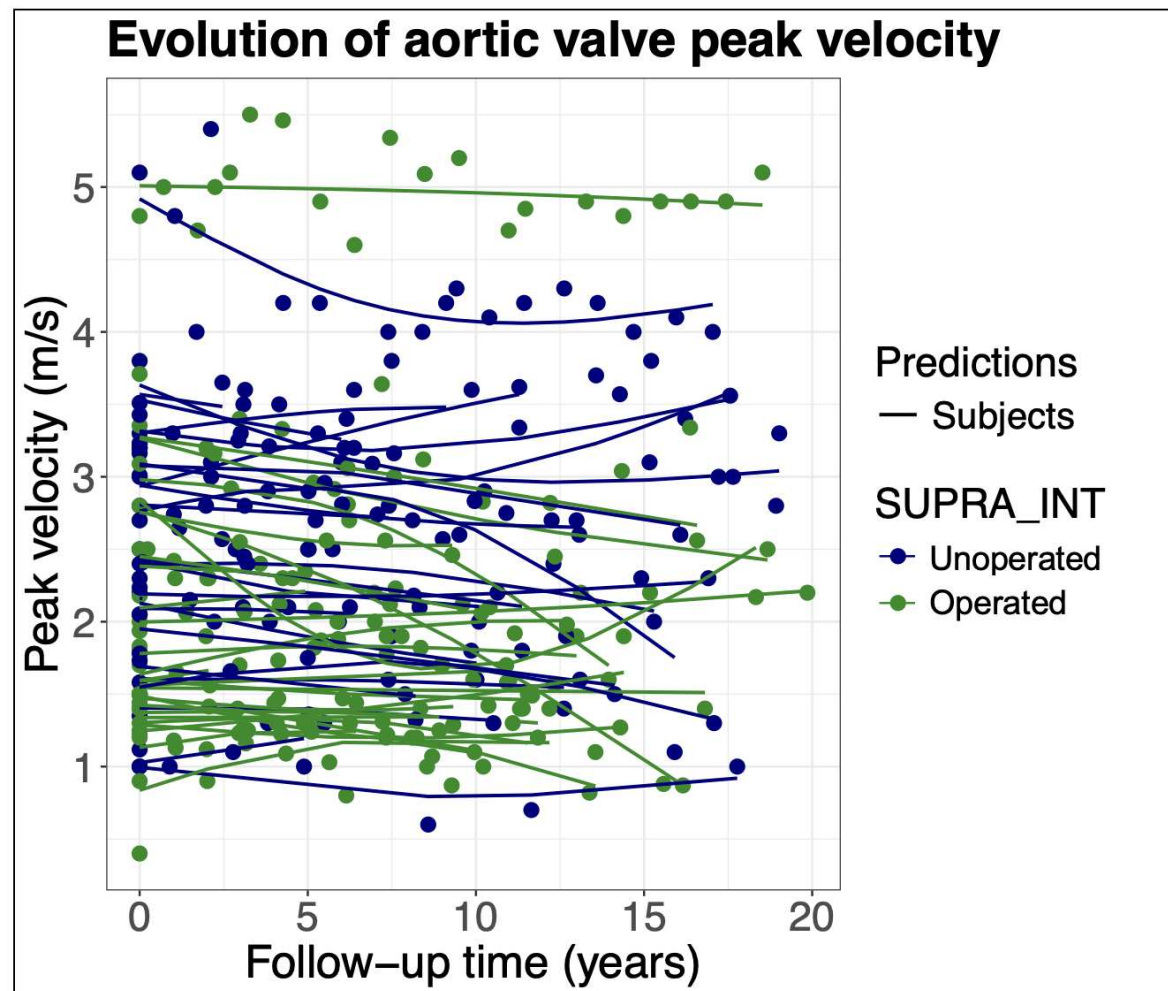

Supplement: inline-supplementary-material-1 [file inline-supplementary-material-1.pdf]
