# Supplementary material
Source: HighWire-hosted journal article supplement (https://openheart.bmj.com/content/12/1/e003355)

# Supravalvular aortic stenosis (SVAS) in adults

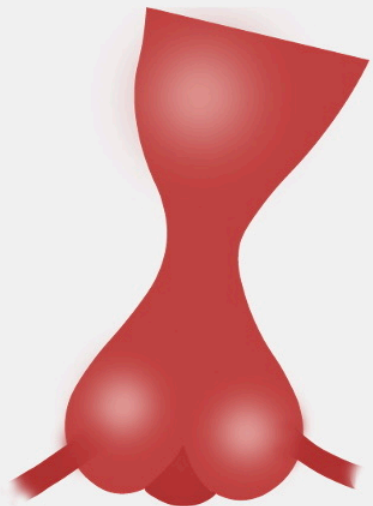

- 65 patients
- Median age: **23(IQR:20,31) years**
  - Williams-Beuren syndrome: **47%**
  - Female: **31%**
  - Previous SVAS correction: **46%**

- Long-term outcomes
- Survival: **95%(95%CI:90%-100%) at 10-years**
  - Event-free survival: **83%(95%CI:74%-93%) at 10-years**
  - No rapid SVAS progression

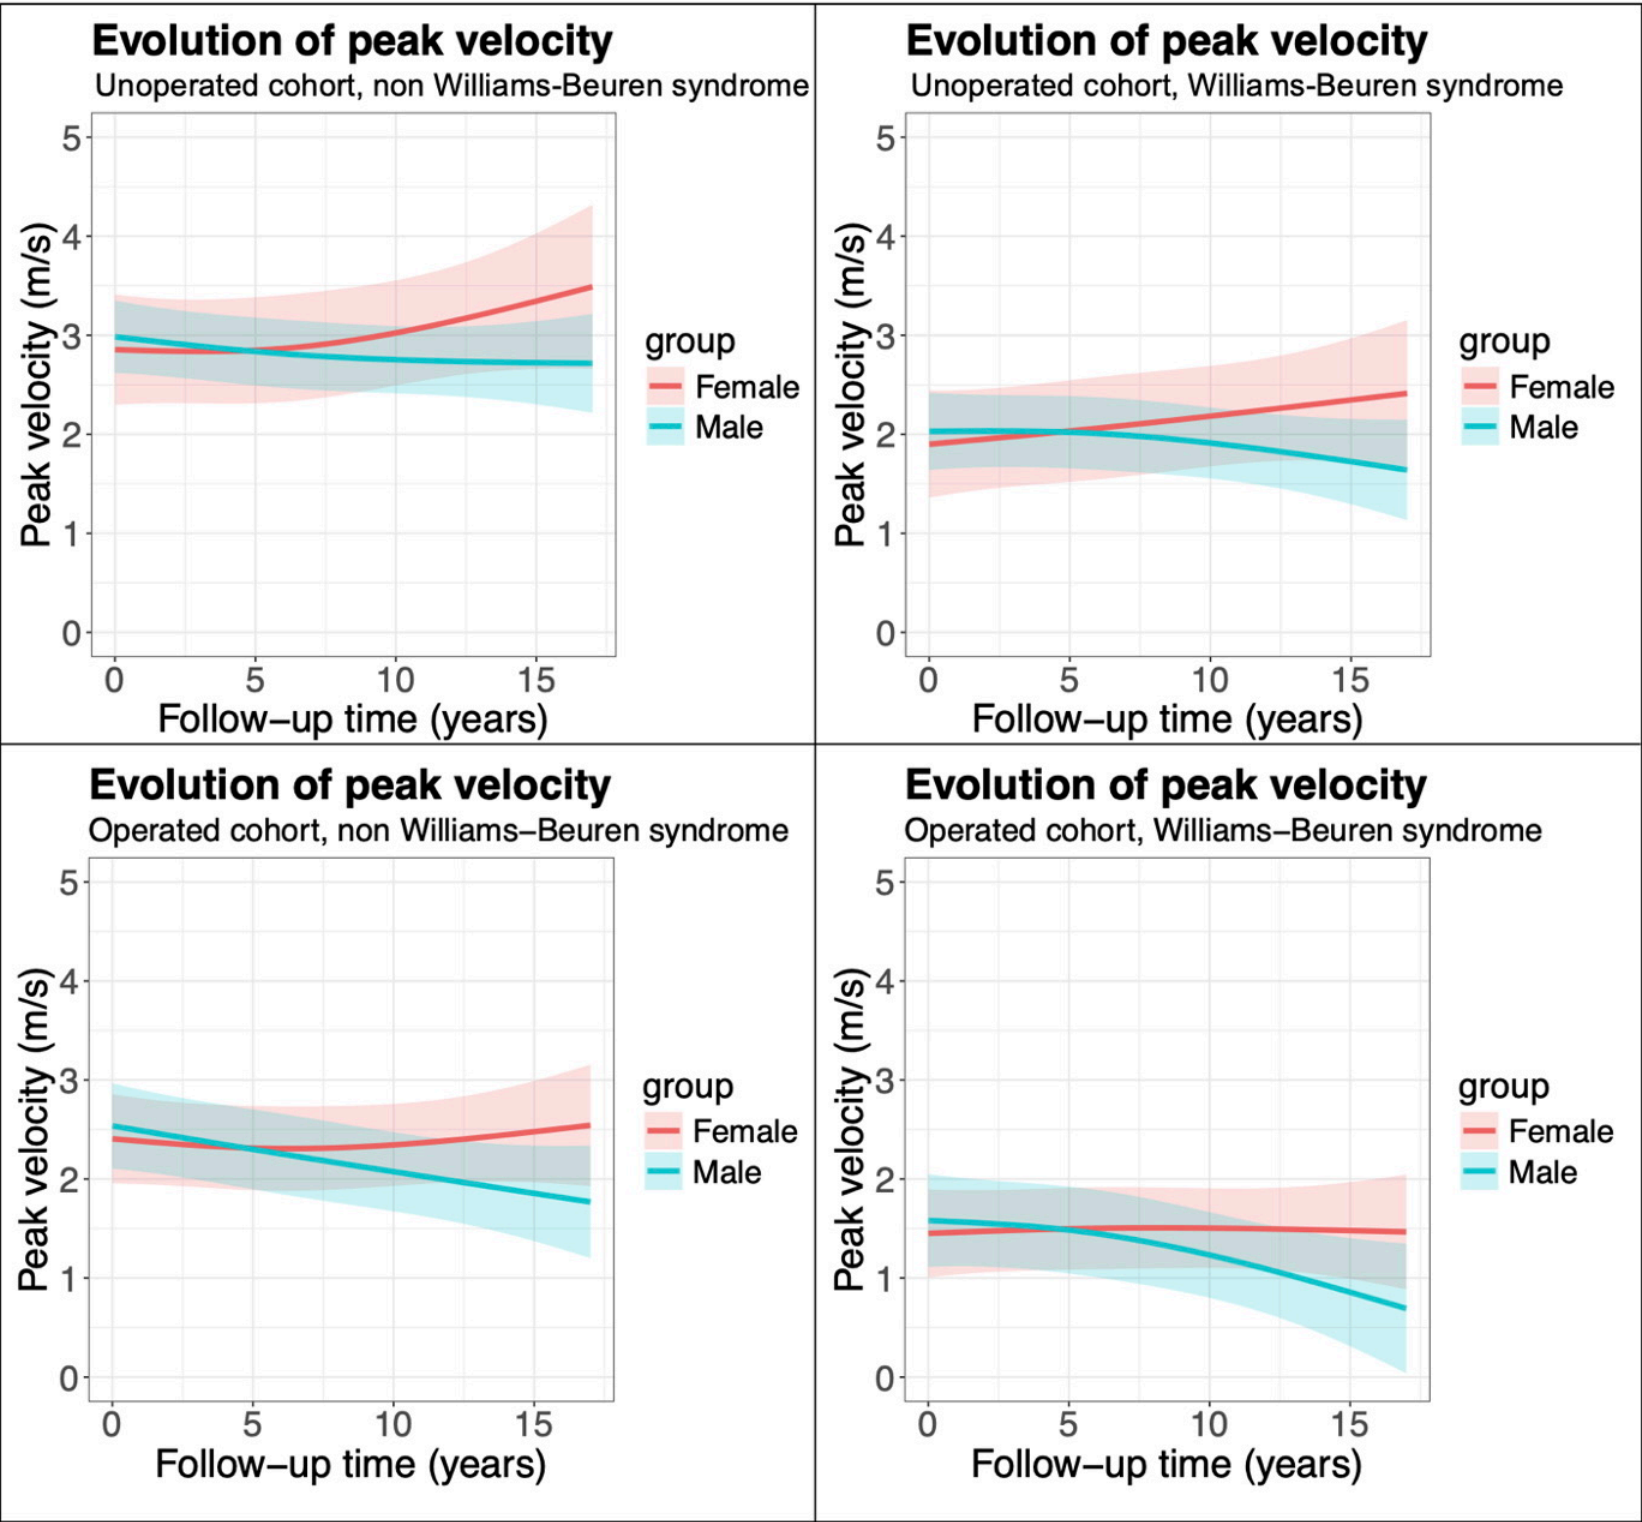

Supplement: inline-supplementary-material-2 [file inline-supplementary-material-2.pdf]
